# Supplementary material
Source: PubMed Central journal article supplement (PMC7898147)
Supplement: rsfs20200039supp3.pdf [file rsfs20200039supp3.pdf]

|         |            |           |           |           |            |            |           |
|---------|------------|-----------|-----------|-----------|------------|------------|-----------|
| ACVR2A  | -1.6224445 | C1orf112  | 1.3868974 | CHST2     | -1.8504837 | CP110      | 1.5127706 |
| ADA     | -1.6221006 | LRFN3     | 1.3861935 | CNKS3     | -1.8463876 | DEF6       | 1.5109489 |
| REC8    | -1.6201486 | ZNF767    | 1.3859649 | COL4A1    | -1.8458296 | NUP85      | 1.5097590 |
| PVRL3   | -1.6178960 | DOCK10    | 1.3855353 | TNFSF10   | -1.8429812 | ABHD10     | 1.5094340 |
| FASTKD5 | -1.6175359 | SUCLG2    | 1.3829811 | GCH1      | -1.8398490 | SPATA7     | 1.5087558 |
| NKX2-2  | -1.6167695 | TSHZ3     | 1.3825536 | B4GALT5   | -1.8396918 | SASH3      | 1.5067446 |
| NSUN4   | -1.6162195 | TWSG1     | 1.3822154 | RIPK1     | -1.8391020 | ZNF217     | 1.5057377 |
| SCO2    | -1.6098832 | NVL       | 1.3820413 | PNO1      | -1.8383927 | LYST       | 1.5036812 |
| CCL1    | -1.6090808 | STAMBPL1  | 1.3811966 | SLC7A11   | -1.8366261 | EVIZA      | 1.5031591 |
| CYP1B1  | -1.6051746 | KIAA1267  | 1.3800448 | ZNF200    | -1.8322011 | CHD7       | 1.5031205 |
| INDO    | -1.6046729 | CREG2     | 1.3800000 | FASTKD5   | -1.8301887 | KIAA0460   | 1.5005214 |
| TRIM56  | -1.5998532 | RNF144    | 1.3791411 | PAPD4     | -1.8298936 | AKAP1      | 1.4996691 |
| STAT4   | -1.5887850 | LYPLA1    | 1.3788360 | DIRA52    | -1.8275174 | RASSF7     | 1.4987013 |
| MYST3   | -1.5846595 | TMEM48    | 1.3788160 | ADPRHL2   | -1.8262740 | PGBD5      | 1.4956370 |
| EPST1   | -1.5772959 | LGI2      | 1.3784167 | DCBLD2    | -1.8252639 | CSGALNACT2 | 1.4948052 |
| RG9MTD1 | -1.5772490 | PRKDC     | 1.3781108 | ICOSLG    | -1.8235294 | CYR61      | 1.4946301 |
| NBPF10  | -1.5767994 | GFPT1     | 1.3780837 | OLR1      | -1.8223160 | FLV14213   | 1.4935760 |
| BCL3    | -1.5744516 | SNAPC2    | 1.3780745 | ADA       | -1.8195132 | SNAP47     | 1.4927405 |
| SFRS15  | -1.5723942 | KLHDC2    | 1.3778152 | TRIM22    | -1.8178694 | AURKA      | 1.4899213 |
| HSPA1L  | -1.5713464 | NFXL1     | 1.3776596 | SLC25A28  | -1.8178634 | F2RL3      | 1.4898990 |
| ATF5    | -1.5701888 | NR2F2     | 1.3773690 | SIK3      | -1.8165072 | ANKMY2     | 1.4895791 |
| LITAF   | -1.5664646 | FANCE     | 1.3772575 | CYP1B1    | -1.8106016 | C6orf59    | 1.4884793 |
| DENND4A | -1.5648982 | PRDM10    | 1.3768089 | NIP7      | -1.8103549 | YEATS4     | 1.4882023 |
| RLF     | -1.5612522 | SCOC      | 1.3754825 | SPSB1     | -1.8098859 | WDR67      | 1.4875927 |
| NBPF20  | -1.5611022 | UBE2Q1    | 1.3751910 | TWISTNB   | -1.8086874 | C16orf59   | 1.4875073 |
| GIMAP8  | -1.5609088 | TRERF1    | 1.3748379 | MT1E      | -1.8077793 | BUB1       | 1.4869305 |
| ARID4B  | -1.5498840 | ZNF330    | 1.3743670 | ZCCHC14   | -1.8072527 | C9orf140   | 1.4859951 |
| TICAM1  | -1.5465995 | CALHM2    | 1.3739076 | DNABJ6    | -1.8050678 | ZNF362     | 1.4849699 |
| MKI67IP | -1.5454166 | NMD3      | 1.3733634 | OAS2      | -1.8003960 | SPC24      | 1.4840056 |
| SNN     | -1.5449495 | CHD1      | 1.3731914 | SLC43A2   | -1.7964405 | NDC80      | 1.4831858 |
| ACSL1   | -1.5418416 | HLX       | 1.3730743 | IFITM1    | -1.7958218 | TRUB2      | 1.4825175 |
| DDIT4   | -1.5407625 | TMEM89    | 1.3721264 | EIF2AK2   | -1.7953670 | DLAGP5     | 1.4817626 |
| CD44    | -1.5381730 | SF3A3     | 1.3711262 | TNFRSF9   | -1.7912422 | FOS        | 1.4816160 |
| CCDC49  | -1.5378486 | TRIB3     | 1.3707580 | IRAK2     | -1.7872081 | ZNF521     | 1.4803493 |
| ATXN7L2 | -1.5367115 | LOC285074 | 1.3702213 | HS3ST3A1  | -1.7870816 | PIP3-E     | 1.4797970 |
| PLA2G7  | -1.5336070 | NME2      | 1.3695271 | GEMIN4    | -1.7823037 | UBTD1      | 1.4797048 |
| C1orf56 | -1.5315175 | GEM       | 1.3684310 | MRPL32    | -1.7796558 | APBB1IP    | 1.4791409 |
| ROCK1   | -1.5311821 | HMMR      | 1.3680919 | C8orf76   | -1.7781343 | PPP3R1     | 1.4789724 |
| EIF5    | -1.5300074 | CCNH      | 1.3678550 | SEMA3A    | -1.7759352 | DEPDC1B    | 1.4786064 |
| CLEC2D  | -1.5276524 | C9orf66   | 1.3663655 | NFKB2     | -1.7733434 | ZBTB4      | 1.4782277 |
| PLAGL2  | -1.5273369 | ZMYND19   | 1.3658127 | HSPH1     | -1.7710324 | ABL2       | 1.4781568 |
| AGPAT4  | -1.5244816 | PSIP1     | 1.3653484 | PHLDB1    | -1.7687716 | SMAAD6     | 1.4762495 |
| PHRF1   | -1.5237366 | KLF9      | 1.3646597 | CKB       | -1.7670093 | NR2F2      | 1.4753363 |
| ORAOV1  | -1.5224551 | SNX4      | 1.3640641 | OGFR      | -1.7613193 | HAVCR2     | 1.4739177 |
| CCBE1   | -1.5215448 | AGGF1     | 1.3636717 | RARRES1   | -1.7604328 | C5orf25    | 1.4727409 |
| TNFAIP1 | -1.5206304 | CRLS1     | 1.3635347 | NOC3L     | -1.7598070 | LRRC25     | 1.4685004 |
| TFAP2A  | -1.5205789 | ARAP3     | 1.3629693 | C5orf5    | -1.7588106 | MBP        | 1.4677159 |
| ZNF480  | -1.5203851 | SNRK      | 1.3623425 | S100A3    | -1.7579538 | CHMP1B     | 1.4675350 |
| CBWD5   | -1.5196317 | CSPP1     | 1.3611650 | BTG2      | -1.7575338 | PSRC1      | 1.4657388 |
| CYP27B1 | -1.5190635 | NEK2      | 1.3606250 | FAM119B   | -1.7549259 | MEF2C      | 1.4651238 |
| KCNJ2   | -1.5186768 | KIAA0232  | 1.3598281 | LIPG      | -1.7528889 | IVNS1ABP   | 1.4645253 |
| FAM53C  | -1.5166317 | PLEKHH3   | 1.3595761 | MYD88     | -1.7494591 | FBXO32     | 1.4644670 |
| CXCR5   | -1.5165037 | WDR67     | 1.3593128 | RUNX3     | -1.7484484 | ASPM       | 1.4640512 |
| ZNF134  | -1.5147797 | RASGRP3   | 1.3592539 | RG9MTD1   | -1.7475538 | C1orf59    | 1.4640150 |
| FLRT2   | -1.5147361 | ANKRD39   | 1.3590604 | C14orf104 | -1.7413953 | BCL6       | 1.4639680 |
| POLS    | -1.5134868 | MYBPH     | 1.3588124 | HOMER1    | -1.7403024 | CDC25C     | 1.4637029 |
| ANTXR2  | -1.5125602 | CD93      | 1.3582983 | DDIT4     | -1.7400581 | KLF6       | 1.4633524 |
| CRK     | -1.5118373 | MRPS26    | 1.3572612 | ZNF689    | -1.7370528 | CD27       | 1.4630682 |
| TMEM217 | -1.5116086 | GLUD2     | 1.3572210 | KCNJ2     | -1.7365353 | SNX26      | 1.4620980 |
| TRIM26  | -1.5114768 | ZNF148    | 1.3556166 | KIAA0133  | -1.7362205 | MTA3       | 1.4611443 |
| LACTB   | -1.5098629 | UTP18     | 1.3548187 | DCP1A     | -1.7330240 | METTL7A    | 1.4602654 |
| TNIP2   | -1.5095238 | ZCCHC7    | 1.3535413 | OASL      | -1.7286389 | RPUSD3     | 1.4598214 |
| FAM119A | -1.5094113 | THBD      | 1.3528384 | HESX1     | -1.7280564 | FANCG      | 1.4589651 |
| SMOX    | -1.5090508 | LIN9      | 1.3525462 | EIF4ENIF1 | -1.7269991 | IRAK3      | 1.4584519 |
| ZBTB10  | -1.5084541 | FASN      | 1.3524537 | FGF2      | -1.7226225 | OIP5       | 1.4578346 |
| HERC5   | -1.5076441 | C4orf14   | 1.3513234 | HAPLN3    | -1.7190594 | WDR62      | 1.4575230 |
| SAR1A   | -1.5072237 | VGLL4     | 1.3511316 | TFAP2A    | -1.7175119 | CCR1       | 1.4574582 |
| IL1A    | -1.5064460 | CHSY3     | 1.3508287 | DNAJA1    | -1.7169550 | PMM1       | 1.4536145 |
| LCMT2   | -1.5061053 | CNIH      | 1.3507119 | RASGRP1   | -1.7149950 | IRAK1BP1   | 1.4533648 |
| CKB     | -1.5049335 | NCKAP1L   | 1.3506999 | ENC1      | -1.7118255 | HS1BP3     | 1.4528509 |
| ZNF296  | -1.5041693 | CHMP1B    | 1.3501931 | TCEB3     | -1.7116015 | TSPAN5     | 1.4526535 |
| TNFSF10 | -1.5039164 | MFSD3     | 1.3501427 | ARID4B    | -1.7068164 | SLC43A1    | 1.4510978 |
| TMEM88  | -1.5018680 |           |           | NCOA6IP   | -1.7059467 | GLCE       | 1.4508591 |
| PVRL2   | -1.5017921 |           |           | BCL9L     | -1.7058824 | PRTFDC1    | 1.4505692 |
| NBPF3   | -1.5014671 |           |           | CFLAR     | -1.7022047 | TUBA4A     | 1.4502297 |
| RFX2    | -1.5012788 |           |           | PHF16     | -1.7017692 | VGLL4      | 1.4492635 |

|               |            |         |            |           |           |
|---------------|------------|---------|------------|-----------|-----------|
| RAP2C         | -1.5001185 | ECGF1   | -1.6999712 | C1orf112  | 1.4482759 |
| PLDN          | -1.4974042 | TAP1    | -1.6992304 | TPX2      | 1.4482495 |
| TNFRSF10B     | -1.4963692 | CSNK1G1 | -1.6971061 | RFC1      | 1.4478261 |
| TJP2          | -1.4961702 | OXTR    | -1.6963563 | STAG3L2   | 1.4466165 |
| PTGER2        | -1.4952390 | BAG3    | -1.6930891 | PLEKHG2   | 1.4451923 |
| MYC           | -1.4950599 | MT1X    | -1.6930013 | PTPN6     | 1.4442700 |
| REV3L         | -1.4947589 | GPR68   | -1.6926310 | CSK       | 1.4433846 |
| CBX4          | -1.4918033 | OAS3    | -1.6903690 | ETV5      | 1.4433807 |
| SOD2          | -1.4910645 | MARCKS  | -1.6898189 | MTMR6     | 1.4431588 |
| FOXD2         | -1.4907631 | IFI35   | -1.6896058 | CCDC34    | 1.4427199 |
| SOCS4         | -1.4892051 | ORAI1   | -1.6890344 | TBC1D22A  | 1.4407745 |
| TAF5L         | -1.4890545 | GBP5    | -1.6889357 | CUL9      | 1.4405987 |
| VHL           | -1.4878865 | RNF19B  | -1.6875235 | TPST1     | 1.4404081 |
| S100A3        | -1.4869110 | KRCC1   | -1.6846307 | STX6      | 1.4398990 |
| EDN1          | -1.4850144 | TBCC    | -1.6831299 | XRCC1     | 1.4395349 |
| BASP1         | -1.4844092 | MAMLD1  | -1.6822857 | GAB2      | 1.4391209 |
| URG4          | -1.4827751 | RNF146  | -1.6820702 | C1orf55   | 1.4360442 |
| C3orf34       | -1.4816380 | GRPEL1  | -1.6807642 | ANGEL1    | 1.4360035 |
| RBM17         | -1.4770544 | REV3L   | -1.6803119 | CHSY3     | 1.4358124 |
| PANX1         | -1.4765419 | RGPD1   | -1.6785396 | PHF21A    | 1.4357574 |
| RAB21         | -1.4756798 | PUS3    | -1.6779374 | SH3TC1    | 1.4352279 |
| WTAP          | -1.4750689 | BIRC3   | -1.6769588 | CACNA2D3  | 1.4351610 |
| KTELC1        | -1.4743755 | REL     | -1.6763029 | JMJ1D1A   | 1.4309072 |
| GPR37         | -1.4729412 | PEL1    | -1.6752068 | CCNB2     | 1.4294813 |
| DKFZP586I142C | -1.4723870 | GRAMD3  | -1.6693122 | FAM113B   | 1.4280339 |
| C3orf59       | -1.4720975 | MTERFD1 | -1.6682096 | UBAC1     | 1.4275581 |
| CYCS          | -1.4713820 | RPS6KC1 | -1.6680871 | LG12      | 1.4272375 |
| MAD2L1BP      | -1.4713734 | ID2     | -1.6675464 | CDKN2C    | 1.4267399 |
| NPTX2         | -1.4708369 | PMM2    | -1.6669202 | SP1       | 1.4265429 |
| SPATA5L1      | -1.4696872 | TRIM25  | -1.6664997 | ZFP90     | 1.4261364 |
| IKZF1         | -1.4672844 | IL27    | -1.6651665 | LOC388692 | 1.4260143 |
| MTF1          | -1.4671889 | TMEM2   | -1.6649163 | PDE7B     | 1.4242081 |
| ZFP36L2       | -1.4650244 | SIX5    | -1.6639344 | CABC1     | 1.4239277 |
| C10orf2       | -1.4636459 | UBTD2   | -1.6639191 | CSPG4     | 1.4233386 |
| KTI12         | -1.4631416 | PANX1   | -1.6625363 | SPC25     | 1.4228723 |
| EFNB2         | -1.4602090 | TIGD5   | -1.6608661 | TMEM37    | 1.4212696 |
| EPC1          | -1.4589409 | LACTB   | -1.6606242 | HIST1H2BH | 1.4210797 |
| IL1R1         | -1.4584396 | USP42   | -1.6589147 | ARID5B    | 1.4209536 |
| SSH1          | -1.4573171 | ALKBH1  | -1.6585938 | MAF       | 1.4208534 |
| PIM1          | -1.4560932 | CD58    | -1.6565952 | CHAF1B    | 1.4194221 |
| SIX5          | -1.4556701 | TRIM21  | -1.6517494 | MCPH1     | 1.4193548 |
| LARP7         | -1.4541055 | N4BP2L1 | -1.6516671 | DOCK10    | 1.4189570 |
| GGNBP2        | -1.4534790 | HSPA1L  | -1.6495221 | ZBTB48    | 1.4180958 |
| C10orf10      | -1.4529667 | PVR     | -1.6489914 | C4orf27   | 1.4175791 |
| RNASEH1       | -1.4525790 | PARP12  | -1.6469875 | NPAT      | 1.4157205 |
| FOXD4         | -1.4522293 | AK3L1   | -1.6453815 | CDC25B    | 1.4151111 |
| H3F3B         | -1.4518183 | TBX3    | -1.6436885 | PDXP      | 1.4149212 |
| RSAD2         | -1.4514056 | NSUN4   | -1.6424552 | C6orf173  | 1.4138737 |
| IFIH1         | -1.4510365 | PHF23   | -1.6420526 | NR2F6     | 1.4136637 |
| OXTR          | -1.4509284 | CNOT4   | -1.6415648 | CDC47L    | 1.4135977 |
| FRY           | -1.4497738 | ASNSD1  | -1.6411000 | MCM4      | 1.4135233 |
| NOLA1         | -1.4481515 | SOCS1   | -1.6407054 | KIF11     | 1.4128485 |
| ICAM1         | -1.4480780 | POLR3D  | -1.6401590 | C1orf218  | 1.4127451 |
| CD82          | -1.4459566 | ICAM1   | -1.6400355 | AURKB     | 1.4125246 |
| NFKB1         | -1.4456562 | GTF2B   | -1.6399962 | TOP2A     | 1.4123767 |
| LRCH3         | -1.4443542 | BCL3    | -1.6395325 | KIF14     | 1.4120194 |
| TRAF3         | -1.4442877 | USP12   | -1.6386586 | MOAP1     | 1.4118104 |
| LYN           | -1.4438173 | STAT2   | -1.6369591 | KIAA0355  | 1.4110109 |
| DDX21         | -1.4438076 | GRAMD1A | -1.6346962 | VAV1      | 1.4108202 |
| KRCC1         | -1.4429235 | FAM53C  | -1.6325854 | CCNH      | 1.4105814 |
| MAP3K8        | -1.4422007 | NOP2    | -1.6325000 | DOK3      | 1.4103535 |
| BRF2          | -1.4420290 | ZNF518B | -1.6316716 | FOXP1     | 1.4101331 |
| BIRC3         | -1.4415449 | SRXN1   | -1.6299694 | HLTF      | 1.4093113 |
| ZNF274        | -1.4410325 | PPRC1   | -1.6296455 | FOXM1     | 1.4085155 |
| SERPINB8      | -1.4410249 | CDGAP   | -1.6293436 | PAK1      | 1.4084658 |
| ZNF394        | -1.4390994 | APOL6   | -1.6281541 | PRDM8     | 1.4069880 |
| IL17RD        | -1.4385727 | IL23A   | -1.6272531 | ZBED5     | 1.4067241 |
| CFB           | -1.4382429 | UGCG    | -1.6251305 | CASP2     | 1.4066858 |
| DOHH          | -1.4376963 | PTCD1   | -1.6231725 | VCAN      | 1.4062500 |
| CCDC16        | -1.4355507 | MST4    | -1.6231557 | TNFAIP8L3 | 1.4058968 |
| MYADM         | -1.4351431 | IL15RA  | -1.6218250 | RAXL1     | 1.4056115 |
| DUSP19        | -1.4347757 | LANCL2  | -1.6209256 | LMNB1     | 1.4052902 |
| LRAP          | -1.4341432 | TFB2M   | -1.6208637 | RSPH3     | 1.4048213 |
| LMOD3         | -1.4334904 | LRG1    | -1.6208305 | MTHFD1L   | 1.4047345 |
| SLC25A34      | -1.4291262 | ACVR2A  | -1.6207366 | VASH1     | 1.4036020 |
| UPF3B         | -1.4280804 | PDRG1   | -1.6184879 | MLLT10    | 1.4023769 |

|            |            |
|------------|------------|
| RRS1       | -1.4276748 |
| ZC3H4      | -1.4274247 |
| ZNF689     | -1.4268785 |
| PARP14     | -1.4256325 |
| KIF1B      | -1.4253561 |
| EIF1       | -1.4249118 |
| GTF2B      | -1.4247981 |
| SLC39A14   | -1.4243603 |
| SVIL       | -1.4236791 |
| PPRC1      | -1.4232164 |
| SIK3       | -1.4228016 |
| WARS       | -1.4212363 |
| NFATC1     | -1.4191002 |
| RTP4       | -1.4186232 |
| C16orf72   | -1.4182988 |
| BMP6       | -1.4178611 |
| PSCD1      | -1.4178379 |
| VCAM1      | -1.4175210 |
| GBP5       | -1.4173220 |
| GRWD1      | -1.4173058 |
| KLF2       | -1.4167782 |
| HEYL       | -1.4165666 |
| LRRC32     | -1.4161948 |
| KLF5       | -1.4160178 |
| SIK1       | -1.4150835 |
| PIM3       | -1.4150701 |
| BATF2      | -1.4148707 |
| FAM119B    | -1.4137291 |
| UFM1       | -1.4136571 |
| TWISTNB    | -1.4133206 |
| ZNF91      | -1.4119210 |
| PDRG1      | -1.4116875 |
| ZBTB43     | -1.4116574 |
| TMEM171    | -1.4114889 |
| CDKN2AIPNL | -1.4107225 |
| RYBP       | -1.4104518 |
| FLJ10081   | -1.4101620 |
| P2RX4      | -1.4099121 |
| RALGDS     | -1.4098188 |
| RUNX1      | -1.4083857 |
| DAXX       | -1.4073753 |
| XAF1       | -1.4073377 |
| GBP4       | -1.4062500 |
| ZNF79      | -1.4057623 |
| SLC43A2    | -1.4044460 |
| RRP12      | -1.4035009 |
| NINJ1      | -1.4028756 |
| EPB41L3    | -1.4002445 |
| C1orf69    | -1.3994709 |
| PLAT       | -1.3991713 |
| PPWD1      | -1.3990808 |
| TUBB2A     | -1.3984035 |
| BDKRB2     | -1.3982301 |
| CCDC55     | -1.3968958 |
| RBM5       | -1.3955284 |
| SIAH2      | -1.3947508 |
| NOC3L      | -1.3947111 |
| ZMAT3      | -1.3942997 |
| TERF2IP    | -1.3941645 |
| SLC25A44   | -1.3941343 |
| TGIF2      | -1.3930849 |
| C15orf63   | -1.3916896 |
| C8orf76    | -1.3916510 |
| C21orf91   | -1.3904459 |
| MEPCE      | -1.3903975 |
| ANKRD37    | -1.3900804 |
| TMEM17     | -1.3896413 |
| RBM4       | -1.3891150 |
| C1orf83    | -1.3887147 |
| ZNF189     | -1.3880309 |
| BRD2       | -1.3870979 |
| OPTN       | -1.3862189 |
| ZNF200     | -1.3858322 |
| MAP3K7IP2  | -1.3842655 |
| NOP58      | -1.3838011 |
| OR8U8      | -1.3832442 |

|          |            |           |           |
|----------|------------|-----------|-----------|
| FOSL1    | -1.6182986 | LINS4     | 1.4022509 |
| NAMPT    | -1.6163717 | SIPA1     | 1.4022400 |
| IRF8     | -1.6162287 | NMRAL1    | 1.4021440 |
| PVRL2    | -1.6156554 | DNTTIP1   | 1.4012650 |
| ATF5     | -1.6145214 | SIGLEC11  | 1.4005450 |
| IL15     | -1.6139456 | NUDT18    | 1.4002814 |
| NAV3     | -1.6108664 | AVP1      | 1.4001490 |
| TRIM36   | -1.6091578 | RNF26     | 1.3999448 |
| CXCL2    | -1.6086742 | DAAM1     | 1.3997429 |
| VGLL2    | -1.6079404 | TCEAL8    | 1.3992806 |
| LCMT2    | -1.6070304 | PRMT10    | 1.3990974 |
|          | 40240      | SLC22A15  | 1.3988790 |
| RIT1     | -1.6026588 | SLBP      | 1.3987657 |
| DDX21    | -1.6022575 | SLC25A20  | 1.3986486 |
| KLF5     | -1.6013265 | CD33      | 1.3984306 |
| GPHA2    | -1.5996979 | RNF125    | 1.3979206 |
| IFI44L   | -1.5991441 | RUSC2     | 1.3978740 |
| HGD      | -1.5987500 | BARD1     | 1.3977525 |
| GMEB2    | -1.5975241 | ZNF775    | 1.3969659 |
| C1orf163 | -1.5973193 | ST3GAL5   | 1.3969152 |
| CXCL12   | -1.5972222 | KIF2C     | 1.3962761 |
| SMAD7    | -1.5953678 | C20orf177 | 1.3959979 |
| C1orf107 | -1.5945166 | ZNF226    | 1.3958333 |
| FIX1     | -1.5943365 | NEU3      | 1.3957447 |
| C19orf61 | -1.5933763 | C17orf53  | 1.3957140 |
| PPAN     | -1.5931507 | PIK3CG    | 1.3948527 |
| SMG1     | -1.5922597 | B4GALNT4  | 1.3947826 |
| SP110    | -1.5896245 | LY6G6C    | 1.3944591 |
| TTC4     | -1.5875118 | COQ3      | 1.3943850 |
| LYN      | -1.5865459 | CNOT8     | 1.3927964 |
| ZNF746   | -1.5859213 | THBD      | 1.3924547 |
| BYSL     | -1.5843373 | FAM184A   | 1.3921739 |
| COL1A1   | -1.5837766 | LRRC26    | 1.3916914 |
| ISG20L2  | -1.5827694 | C6orf167  | 1.3915212 |
| CRKRS    | -1.5811018 | KLHDC2    | 1.3914171 |
| SMOX     | -1.5806452 | GPR77     | 1.3911249 |
| BCL11A   | -1.5803959 | ATF3      | 1.3910377 |
| TUBB2A   | -1.5783476 | GF11      | 1.3902760 |
| FAM129A  | -1.5783334 | CTDSPL    | 1.3893385 |
| EIF1     | -1.5782202 | XPC       | 1.3884958 |
| KDM6B    | -1.5777778 | CENTG2    | 1.3878683 |
| CD38     | -1.5771176 | MAD2L1    | 1.3875493 |
| HIVEP2   | -1.5770908 | ZNF524    | 1.3861599 |
| JAK2     | -1.5746308 | ERCC5     | 1.3856958 |
| TRIM11   | -1.5738881 | TRAF3IP3  | 1.3850776 |
| BRD2     | -1.5726057 | NTHL1     | 1.3849658 |
| RASL10A  | -1.5704971 | MTBP      | 1.3844813 |
| NPTX2    | -1.5702875 | PHACTR1   | 1.3843972 |
| MAT2A    | -1.5685680 | STOX2     | 1.3835294 |
| KBTBD8   | -1.5671067 | FAM156A   | 1.3828534 |
| SLFN5    | -1.5669031 | F13A1     | 1.3826788 |
| YTHDF2   | -1.5665374 | HNRPLL    | 1.3805296 |
| SVIL     | -1.5661066 | RXRA      | 1.3797991 |
| RN7SK    | -1.5644903 | ZNF642    | 1.3795365 |
| WTAP     | -1.5635432 | CENPN     | 1.3795021 |
| C12orf44 | -1.5598863 | NLRX1     | 1.3792727 |
| RGL1     | -1.5562202 | ZCCHC7    | 1.3786008 |
| NKRF     | -1.5560641 | POLQ      | 1.3773413 |
| PTX3     | -1.5553633 | BCAT2     | 1.3772352 |
| CDV3     | -1.5521409 | FZD2      | 1.3766938 |
| MAD2L1BP | -1.5520601 | ARHGAP25  | 1.3766730 |
| ISG20    | -1.5515097 | HDAC8     | 1.3764115 |
| GPR132   | -1.5507102 | FHOD1     | 1.3761536 |
| URG4     | -1.5492341 | C16orf53  | 1.3761286 |
| FAM190B  | -1.5478212 | IMPA2     | 1.3759742 |
| EXOG     | -1.5472103 | PHACTR3   | 1.3756728 |
| WDR63    | -1.5465995 | MIOS      | 1.3754961 |
| ELAVL1   | -1.5464983 | RAB9A     | 1.3753226 |
| AMMECR1  | -1.5461103 | KHDC1     | 1.3741497 |
| ZBTB10   | -1.5459242 | GPR65     | 1.3736059 |
| PHLDA2   | -1.5441441 | AGGF1     | 1.3729132 |
| RIPK5    | -1.5417178 | BUB1B     | 1.3725237 |
| AMPD3    | -1.5412748 | CMTM7     | 1.3720763 |
| IER5     | -1.5412204 | CENPJ     | 1.3718704 |
| GBP3     | -1.5409695 | ZNF280D   | 1.3717949 |
| WDR82    | -1.5408395 | ITPKB     | 1.3717884 |

|           |            |
|-----------|------------|
| B4GALT1   | -1.3827701 |
| FAM43A    | -1.3827238 |
| CHRNA5    | -1.3805375 |
| TMEM2     | -1.3797134 |
| ZNF549    | -1.3792084 |
| FZD9      | -1.3790150 |
| LOC399900 | -1.3785280 |
| NDEL1     | -1.3783534 |
| DEM1      | -1.3782394 |
| TBX3      | -1.3752621 |
| PGM2L1    | -1.3751152 |
| CDC42EP4  | -1.3745889 |
| SEMA3C    | -1.3744131 |
| TP53BP2   | -1.3723958 |
| ACAT2     | -1.3707665 |
| TMEM194   | -1.3705319 |
| INTS6     | -1.3695187 |
| CH25H     | -1.3688852 |
| CDC5L     | -1.3686969 |
| CECR1     | -1.3686806 |
| RAE1      | -1.3686275 |
| LRRC50    | -1.3684675 |
| C1orf212  | -1.3674559 |
| TP53INP2  | -1.3672754 |
| AKIRIN1   | -1.3671764 |
| NFIX      | -1.3660346 |
| LDLOC1L   | -1.3652866 |
| ASNSD1    | -1.3650427 |
| PTPRE     | -1.3646756 |
| IL4I1     | -1.3644745 |
| OAS1      | -1.3643341 |
| C14orf153 | -1.3643092 |
| C6orf150  | -1.3641649 |
| KDM6B     | -1.3641457 |
| GRIPAP1   | -1.3638749 |
| IFITM3    | -1.3635839 |
| LOC644615 | -1.3626269 |
| ORAI1     | -1.3623544 |
| ICOSLG    | -1.3620574 |
| FAM118A   | -1.3615935 |
| NBPF14    | -1.3610531 |
| TAF13     | -1.3596750 |
| C2orf76   | -1.3595767 |
| ZC3H12A   | -1.3588845 |
| RPUSD2    | -1.3577465 |
| C1orf128  | -1.3573908 |
| CHST7     | -1.3570879 |
| TRA1P2    | -1.3560254 |
| RGL2      | -1.3559585 |
| RBM8A     | -1.3552492 |
| DDX51     | -1.3551015 |
| FAM107B   | -1.3548013 |
| FKBP14    | -1.3544920 |
| TLR2      | -1.3544631 |
| C1orf166  | -1.3536165 |
| SFRS6     | -1.3532413 |
| EZH2      | -1.3531461 |
| IFNAR2    | -1.3527212 |
| ZNF521    | -1.3508204 |
| HRH1      | -1.3503106 |

|           |            |              |           |
|-----------|------------|--------------|-----------|
| C14orf169 | -1.5406883 | RAD54L       | 1.3713860 |
| E2F6      | -1.5406427 | C1orf162     | 1.3708148 |
| RCL1      | -1.5402588 | INPP4B       | 1.3706628 |
| CYCS      | -1.5393969 | EHD4         | 1.3699261 |
| MTMR9     | -1.5384122 | ANKRD35      | 1.3699060 |
| GLIS3     | -1.5374765 | ZNF533       | 1.3678065 |
| CCNYL1    | -1.5370920 | HVCN1        | 1.3666480 |
| SNORA25   | -1.5366260 | ZNF703       | 1.3666352 |
| IRF1      | -1.5363170 | UAP1L1       | 1.3662814 |
| OPTN      | -1.5353753 | CORO1A       | 1.3662751 |
| TRADD     | -1.5346939 | HOXA10       | 1.3661972 |
| HRH1      | -1.5345436 | RPL39L       | 1.3655518 |
| SERPINB7  | -1.5342640 | VPS37B       | 1.3651527 |
| POP1      | -1.5339569 | JAZF1        | 1.3641598 |
| ZBTB9     | -1.5311751 | MGC15763     | 1.3635699 |
| PPP1R10   | -1.5309951 | JMY          | 1.3635280 |
| MEPCE     | -1.5306147 | TOPBP1       | 1.3632038 |
| BRIX1     | -1.5298421 | TMEM129      | 1.3619632 |
| SAP30BP   | -1.5294726 | CENTB2       | 1.3619048 |
| CHST7     | -1.5293554 | NCAPD2       | 1.3617571 |
| CHERP     | -1.5288235 | LOC92017     | 1.3607189 |
| TICAM1    | -1.5280750 | TCF12        | 1.3606789 |
| FBXO30    | -1.5272657 | NUDT16       | 1.3606299 |
| MED26     | -1.5256988 | RSAD1        | 1.3603269 |
| PLEKHA9   | -1.5256594 | ITPR3        | 1.3600613 |
| CRK       | -1.5246418 | CD63         | 1.3593086 |
| NCF2      | -1.5242434 | C14orf4      | 1.3587187 |
| ZNF691    | -1.5223881 | PARP2        | 1.3586272 |
| GPR137B   | -1.5210264 | HBP1         | 1.3586098 |
| GTPBP4    | -1.5209863 | SMC3         | 1.3585627 |
| TRMT61A   | -1.5208914 | TCEAL3       | 1.3579653 |
| SHQ1      | -1.5200000 | PSD4         | 1.3579447 |
| ZUFSP     | -1.5192550 | C12orf52     | 1.3578192 |
| REXO4     | -1.5153966 | FAM72D       | 1.3575368 |
| SUPV3L1   | -1.5152130 | RP5-1022P6.2 | 1.3574695 |
| ANKRD37   | -1.5145631 | CXCR3        | 1.3574144 |
| SERPINB8  | -1.5143832 | NCKIPSD      | 1.3568158 |
| SLC7A2    | -1.5143805 | KDEL2        | 1.3567822 |
| TAF5      | -1.5142511 | PFKP         | 1.3563371 |
| HIVEP3    | -1.5100402 | KBTBD11      | 1.3561187 |
| HCK       | -1.5100218 | KIF18A       | 1.3560000 |
| TNFRSF10D | -1.5099685 | RER1         | 1.3556728 |
| CPNE8     | -1.5086298 | LRP5L        | 1.3548673 |
| PSCD1     | -1.5084625 | SMYD2        | 1.3548156 |
| DAXX      | -1.5070721 | RCAN3        | 1.3547401 |
| RRN3      | -1.5067265 | ZNF439       | 1.3545035 |
| PIM1      | -1.5064289 | SCGB1C1      | 1.3542857 |
| BCL2L1    | -1.5064227 | B3GALT4      | 1.3535857 |
| RNF219    | -1.5060414 | SSH2         | 1.3531157 |
| CROP      | -1.5059750 | ANKRD39      | 1.3527762 |
| CLINT1    | -1.5050275 | COPS7B       | 1.3527426 |
| CCDC16    | -1.5021895 | C8FB         | 1.3525836 |
| STK40     | -1.5014972 | NAT6         | 1.3520801 |
| RIOK2     | -1.5005441 | UBE2R2       | 1.3515625 |
| MIDN      | -1.4998443 | HMBS         | 1.3514938 |
| PTRH2     | -1.4996979 | HMBOX1       | 1.3513300 |
| MPZL1     | -1.4996825 | THOP1        | 1.3512786 |
| C21orf91  | -1.4991817 | FLJ20489     | 1.3510526 |
| LCOR      | -1.4983775 | MCM3         | 1.3502373 |
| NXT1      | -1.4976213 |              |           |
| C18orf25  | -1.4975202 |              |           |
| MTHFD2    | -1.4971551 |              |           |
| SAMD9     | -1.4936075 |              |           |
| MED10     | -1.4901026 |              |           |
| A4GALT    | -1.4866667 |              |           |
| USP38     | -1.4863709 |              |           |
| IRX5      | -1.4851064 |              |           |
| DDX60     | -1.4841161 |              |           |
| SFRS15    | -1.4838377 |              |           |
| SFRS10    | -1.4831120 |              |           |
| LRRC32    | -1.4825127 |              |           |
| RUNX1     | -1.4822727 |              |           |
| MFAP1     | -1.4816950 |              |           |
| MTE       | -1.4791844 |              |           |
| DTNA      | -1.4786082 |              |           |
| SPAG9     | -1.4776105 |              |           |

|          |            |
|----------|------------|
| COL4A2   | -1.4773663 |
| WDR4     | -1.4770642 |
| FEM1A    | -1.4764941 |
| CXCR5    | -1.4761905 |
| BRPF1    | -1.4755435 |
| PDPN     | -1.4746680 |
| C18orf19 | -1.4744280 |
| C12orf41 | -1.4727273 |
| IL10RA   | -1.4724442 |
| BCDIN3D  | -1.4723757 |
| TRAFD1   | -1.4721084 |
| TXNRD1   | -1.4718338 |
| FBXO6    | -1.4705352 |
| PPM1D    | -1.4703978 |
| SOCS4    | -1.4694190 |
| RP9      | -1.4683735 |
| RND3     | -1.4663210 |
| TP53INP2 | -1.4657204 |
| GALNT4   | -1.4655103 |
| C1orf52  | -1.4649306 |
| LITAF    | -1.4636606 |
| FAM107B  | -1.4634347 |
| PSEN1    | -1.4625144 |
| RBM4     | -1.4621103 |
| GRWD1    | -1.4601403 |
| BCL2L13  | -1.4595950 |
| C16orf91 | -1.4593618 |
| CLIC6    | -1.4585492 |
| ZNF828   | -1.4576730 |
| GBP4     | -1.4573556 |
| RBM7     | -1.4571581 |
| SBNO2    | -1.4557867 |
| MT1G     | -1.4555085 |
| ZNFX1    | -1.4554676 |
| SLCO3A1  | -1.4554358 |
| HSCB     | -1.4535883 |
| USP15    | -1.4534687 |
| SECISBP2 | -1.4529213 |
| IL1R1    | -1.4529120 |
| C2CD2    | -1.4521433 |
| ZNF234   | -1.4513138 |
| DUSP2    | -1.4506978 |
| IKZF1    | -1.4501116 |
| FXYD6    | -1.4500000 |
| IFI16    | -1.4492438 |
| ZBTB38   | -1.4489612 |
| TMEM64   | -1.4484716 |
| REC8     | -1.4475676 |
| TICAM2   | -1.4473572 |
| CD276    | -1.4469100 |
| BCAR3    | -1.4468824 |
| ADCY8    | -1.4456415 |
| ZNF529   | -1.4447421 |
| C3orf59  | -1.4445601 |
| C6orf150 | -1.4441549 |
| CCDC85A  | -1.4426070 |
| ZBTB24   | -1.4412679 |
| BAG5     | -1.4411593 |
| THAP6    | -1.4408163 |
| ZNF614   | -1.4404675 |
| B3GALT6  | -1.4404375 |
| ZXDB     | -1.4404104 |
| PLA2G4C  | -1.4403212 |
| FOXD2    | -1.4401993 |
| ANGEL2   | -1.4400000 |
| RAE1     | -1.4393087 |
| CDC25A   | -1.4390564 |
| SLC35F5  | -1.4389201 |
| SNX16    | -1.4388835 |
| CCNJ     | -1.4388271 |
| MLLT11   | -1.4377798 |
| GPATCH4  | -1.4375409 |
| INTS5    | -1.4372497 |
| C2orf40  | -1.4368845 |
| PNRC1    | -1.4365838 |
| SIRT1    | -1.4358578 |

|          |            |
|----------|------------|
| ZNF800   | -1.4352493 |
| UPF1     | -1.4348348 |
| BCORL1   | -1.4337662 |
| TRIB2    | -1.4321306 |
| ZNF721   | -1.4317181 |
| BRF2     | -1.4316284 |
| C1orf69  | -1.4306261 |
| PLXNA1   | -1.4305455 |
| ASAP1    | -1.4301636 |
| DOLK     | -1.4293333 |
| C2orf44  | -1.4289118 |
| CCR7     | -1.4284613 |
| NAB1     | -1.4283886 |
| SPATA5L1 | -1.4280941 |
| YWHAG    | -1.4280615 |
| NFAT5    | -1.4278607 |
| TP53BP2  | -1.4278402 |
| KTI12    | -1.4275980 |
| GBP1     | -1.4272833 |
| KLHL28   | -1.4269893 |
| C22orf42 | -1.4269663 |
| GCC1     | -1.4266754 |
| ZNF296   | -1.4263935 |
| PAPD1    | -1.4259328 |
| WSB1     | -1.4257481 |
| ANTXR2   | -1.4255591 |
| SQSTM1   | -1.4255354 |
| CENTA1   | -1.4254597 |
| TBC1D2B  | -1.4234199 |
| ZBTB46   | -1.4224328 |
| CDC42EP4 | -1.4217818 |
| HPS6     | -1.4214400 |
| CDC42SE1 | -1.4211768 |
| NOL11    | -1.4204498 |
| NOP56    | -1.4203443 |
| SMG5     | -1.4198047 |
| RNF34    | -1.4196551 |
| NFKB1    | -1.4195272 |
| TOP1     | -1.4193342 |
| ZNF134   | -1.4183206 |
| C1orf109 | -1.4179894 |
| ZNF350   | -1.4171975 |
| CLP1     | -1.4166993 |
| IFI27    | -1.4166667 |
| USPL1    | -1.4165425 |
| MEGF9    | -1.4163934 |
| NR5A2    | -1.4163823 |
| MYO1B    | -1.4159223 |
| CCNA1    | -1.4153110 |
| DKC1     | -1.4147601 |
| MLLT6    | -1.4147517 |
| SOD2     | -1.4146792 |
| SAMD5    | -1.4140508 |
| ADAR     | -1.4135139 |
| PPP3CC   | -1.4131492 |
| SLAMF1   | -1.4123037 |
| KCTD12   | -1.4114749 |
| RBMS     | -1.4112727 |
| PITPNB   | -1.4112245 |
| NCF1     | -1.4111801 |
| EXOSC3   | -1.4109983 |
| CEBPD    | -1.4107100 |
| TLR2     | -1.4100395 |
| ZNHIT6   | -1.4097859 |
| GPATCH3  | -1.4097331 |
| IER5L    | -1.4085422 |
| SNAPC4   | -1.4077517 |
| SPATA2   | -1.4076923 |
| TJP2     | -1.4075124 |
| SNIP1    | -1.4074351 |
| ZNF189   | -1.4072643 |
| NXF1     | -1.4071788 |
| LRRC3    | -1.4068648 |
| KCTD5    | -1.4066344 |
| RNMTL1   | -1.4066127 |
| TRAF1    | -1.4056884 |



|          |            |
|----------|------------|
| CEBPZ    | -1.4054273 |
| CD82     | -1.4051262 |
| CYTH1    | -1.4046512 |
| DUX1     | -1.4045113 |
| TNFSF13B | -1.4042822 |
| SEMA3D   | -1.4039271 |
| ORAOV1   | -1.4037324 |
| CLDN1    | -1.4034720 |
| C19orf12 | -1.4029968 |
| GTF2E1   | -1.4026531 |
| TOP3A    | -1.4019544 |
| KTELC1   | -1.4018447 |
| PKNOX1   | -1.4015267 |
| TRIM26   | -1.4000000 |
| EIF3J    | -1.3999624 |
| PHLPP2   | -1.3998119 |
| TIMM22   | -1.3997655 |
| TLK2     | -1.3996279 |
| UPB1     | -1.3996082 |
| NUMB     | -1.3995012 |
| FLJ10081 | -1.3976763 |
| FRMD7    | -1.3976693 |
| LRP12    | -1.3970070 |
| COG3     | -1.3967972 |
| TRIM5    | -1.3952452 |
| CYLD     | -1.3952239 |
| PAXIP1   | -1.3951853 |
| PPP1R15B | -1.3946247 |
| ZCCHC3   | -1.3946166 |
| CEBPG    | -1.3940779 |
| TOR1B    | -1.3940651 |
| HES4     | -1.3930764 |
| MSC      | -1.3930418 |
| CBLL1    | -1.3929165 |
| FCAMR    | -1.3922518 |
| DDX5     | -1.3915014 |
| TIAM2    | -1.3907767 |
| GPR161   | -1.3902778 |
| NOLC1    | -1.3899467 |
| RAB35    | -1.3897661 |
| FASTKD2  | -1.3896907 |
| ATPBD3   | -1.3888405 |
| DHX37    | -1.3888128 |
| C1orf131 | -1.3884439 |
| GP6      | -1.3879599 |
| ZFAND2A  | -1.3878969 |
| 40246    | -1.3859416 |
| HIC2     | -1.3858570 |
| PLEKHF1  | -1.3852814 |
| HCFC2    | -1.3847340 |
| AKIRIN1  | -1.3832467 |
| RGS13    | -1.3822739 |
| C19orf23 | -1.3822598 |
| TUBB2B   | -1.3820982 |
| C20orf4  | -1.3818549 |
| BID      | -1.3815123 |
| SELI     | -1.3814484 |
| FOXN2    | -1.3814050 |
| ATP2B1   | -1.3812641 |
| UBE2L6   | -1.3811077 |
| DIP2B    | -1.3810565 |
| IFIT5    | -1.3808630 |
| SLCO4A1  | -1.3801437 |
| RHOG     | -1.3797654 |
| SAR1A    | -1.3795570 |
| RAB33B   | -1.3792872 |
| PLXNC1   | -1.3775216 |
| OBFC2A   | -1.3772961 |
| CDH2     | -1.3771347 |
| CAPN2    | -1.3770615 |
| BAZ1A    | -1.3770146 |
| TCF4     | -1.3758454 |
| SLC43A3  | -1.3756913 |
| ACTR1A   | -1.3731343 |
| GRPEL2   | -1.3731156 |
| BAALC    | -1.3730909 |

|           |            |
|-----------|------------|
| ALS2CR4   | -1.3729306 |
| KHNYN     | -1.3728909 |
| OSGIN1    | -1.3725992 |
| CD274     | -1.3720350 |
| NOB1      | -1.3715996 |
| RCAN1     | -1.3715612 |
| ZNF770    | -1.3714286 |
| ARHGEF2   | -1.3713643 |
| ZNF12     | -1.3694427 |
| BHLHB3    | -1.3687330 |
| EFR3A     | -1.3682008 |
| RPUSD2    | -1.3679363 |
| IFIH1     | -1.3673254 |
| ZSWIM4    | -1.3671677 |
| PDHX      | -1.3670373 |
| YTHDF1    | -1.3659812 |
| FAM133B   | -1.3658807 |
| CPEB4     | -1.3656716 |
| CDK9      | -1.3655110 |
| BMP6      | -1.3648736 |
| DDI2      | -1.3641882 |
| LAP3      | -1.3636585 |
| ZNF146    | -1.3633886 |
| HSPA8     | -1.3633509 |
| UBE2Z     | -1.3629755 |
| C6orf81   | -1.3624498 |
| SYS1      | -1.3624434 |
| TIMP3     | -1.3622926 |
| C17orf71  | -1.3622129 |
| ZNF235    | -1.3620915 |
| KIAA2010  | -1.3618109 |
| TOP1P2    | -1.3606765 |
| NCF1C     | -1.3597080 |
| MKL1      | -1.3595297 |
| C17orf97  | -1.3591885 |
| INTS6     | -1.3588379 |
| ZNF227    | -1.3588291 |
| LOC389286 | -1.3587402 |
| TP53RK    | -1.3584596 |
| TMEM11    | -1.3580442 |
| TYW3      | -1.3579295 |
| TSFM      | -1.3577938 |
| CTHRC1    | -1.3574423 |
| C10orf2   | -1.3573051 |
| C19orf66  | -1.3568773 |
| IP6K1     | -1.3564298 |
| FAM175B   | -1.3558368 |
| STAT1     | -1.3550855 |
| SGTB      | -1.3544180 |
| INGX      | -1.3543990 |
| POLS      | -1.3539346 |
| SCYL3     | -1.3537234 |
| POLR2D    | -1.3536854 |
| ZNF761    | -1.3530928 |
| FKRP      | -1.3524735 |
| TMEM88    | -1.3522013 |
| PI4KB     | -1.3521263 |
| C11orf46  | -1.3518851 |
| ETFDH     | -1.3514333 |
| NANP      | -1.3511269 |
| C12orf31  | -1.3510535 |
| OTUD4     | -1.3510034 |
| C17orf63  | -1.3502915 |
