# Supplementary material
Source: PubMed Central journal article supplement (PMC7898147)
Supplement: rsfs20200039supp5.pdf [file rsfs20200039supp5.pdf]

|               |           |                 |                   |               |           |
|---------------|-----------|-----------------|-------------------|---------------|-----------|
| Midn          | 1.3952294 | <b>Bst2</b>     | <b>-2.1096566</b> | Mfng          | 1.8132465 |
| Cryba4        | 1.3906561 | <b>Flrt3</b>    | <b>-2.1078587</b> | Zdhhc14       | 1.8112858 |
| Errfi1        | 1.3902137 | <b>Zfp710</b>   | <b>-2.0887628</b> | Rrm2          | 1.8105035 |
| Wwc1          | 1.3901345 | <b>Gpc1</b>     | <b>-2.0856898</b> | Id3           | 1.8052580 |
| Aff1          | 1.3826868 | <b>Stat3</b>    | <b>-2.0823203</b> | Kif22         | 1.8025590 |
| Dusp6         | 1.3815722 | <b>Tor3a</b>    | <b>-2.0539786</b> | Heca          | 1.7954769 |
| OTTMUSG0000C  | 1.3782148 | <b>Axl</b>      | <b>-2.0534085</b> | Sirpa         | 1.7922856 |
| Il33          | 1.3765690 | <b>Mxd1</b>     | <b>-2.0454545</b> | Bcl7a         | 1.7807425 |
| Edn1          | 1.3744417 | <b>Ppm1k</b>    | <b>-2.0396237</b> | Rad18         | 1.7790598 |
| Fem1b         | 1.3741791 | <b>AI451557</b> | <b>-2.0327699</b> | Dbf4          | 1.7778341 |
| Wsb1          | 1.3718469 | <b>Vegfc</b>    | <b>-2.0289207</b> | 1700023M03Rik | 1.7740113 |
| Carhsp1       | 1.3690425 | <b>Mcoln2</b>   | <b>-2.0276735</b> | Mad2l1        | 1.7739589 |
| Clnk          | 1.3689840 | <b>Nt5c3</b>    | <b>-2.0213443</b> | 0610010E21Rik | 1.7686077 |
| Idi1          | 1.3660762 | <b>Usp21</b>    | <b>-2.0179303</b> | Mum1          | 1.7667474 |
| Sema4b        | 1.3637695 | <b>BC037034</b> | <b>-2.0164199</b> | Add3          | 1.7623318 |
| Bicap         | 1.3627922 | <b>Picl2</b>    | <b>-2.0013541</b> | 4930455F23Rik | 1.7604396 |
| 1700003F12Rik | 1.3611111 | Sp140           | -1.9854601        | Fahd1         | 1.7510812 |
| Tpbg          | 1.3602762 | Mx2             | -1.9730675        | Aurka         | 1.7504267 |
| Foxo1         | 1.3581081 | Mustn1          | -1.9730586        | Cenpa         | 1.7501395 |
| Pqlc1         | 1.3568313 | Taar3           | -1.9679144        | Tdrkh         | 1.7467057 |
| Fem1c         | 1.3561644 | 1190002H23Rik   | -1.9674110        | Slc39a10      | 1.7427502 |
| Flrt2         | 1.3543948 | Bid             | -1.9645936        | Pgp           | 1.7411585 |
| Tor1aip1      | 1.3525296 | Nrap            | -1.9645120        | Elov16        | 1.7372014 |
| Il7r          | 1.3513329 | Aig1            | -1.9559394        | Helb          | 1.7365967 |
| Cicn7         | 1.3500605 | Slc7a8          | -1.9557022        | Sqle          | 1.7363794 |
|               |           | Oas1a           | -1.9501865        | Appl2         | 1.7313433 |
|               |           | Max             | -1.9462173        | Pim3          | 1.7310924 |
|               |           | BC094916        | -1.9381492        | Hist2h2ab     | 1.7275144 |
|               |           | Pml             | -1.9378975        | LOC382010     | 1.7233351 |
|               |           | Fpr2            | -1.9320557        | Spag5         | 1.7223253 |
|               |           | LOC100047707    | -1.9192844        | Cxcl2         | 1.7222396 |
|               |           | Tha1            | -1.9082759        | Asf1b         | 1.7188241 |
|               |           | Pouz2f2         | -1.9075194        | Tk1           | 1.7183544 |
|               |           | Trim56          | -1.9058722        | D330045A20Rik | 1.7171381 |
|               |           | Cd69            | -1.9042942        | Traf1         | 1.7171148 |
|               |           | Car2            | -1.9013232        | Chst3         | 1.7167339 |
|               |           | Cam1            | -1.8984217        | H2afx         | 1.7124741 |
|               |           | Dusp6           | -1.8979355        | Tnfaip8       | 1.7096195 |
|               |           | Tap1            | -1.8979239        | Dyrk3         | 1.7093936 |
|               |           | Fcgr3           | -1.8895977        | Hirip3        | 1.7059896 |
|               |           | Il27            | -1.8848553        | Cdca8         | 1.7057119 |
|               |           | Rab3d           | -1.8824946        | Cenpn         | 1.6899110 |
|               |           | Bcl3            | -1.8792651        | Slc20a1       | 1.6895397 |
|               |           | LOC381302       | -1.8768908        | Rfc4          | 1.6876904 |
|               |           | Tnfrsf1a        | -1.8745675        | Tpx2          | 1.6835693 |
|               |           | Keap1           | -1.8688922        | E130306D19Rik | 1.6831604 |
|               |           | 5031414D18Rik   | -1.8681319        | Pter          | 1.6796193 |
|               |           | Sbno2           | -1.8669291        | Sephs2        | 1.6788422 |
|               |           | Ext1            | -1.8646219        | Dnmt1         | 1.6753560 |
|               |           | Rgs1            | -1.8611352        | D2Ertd750e    | 1.6748682 |
|               |           | Ifit2           | -1.8611007        | Vegfa         | 1.6741655 |
|               |           | D16Ertd472e     | -1.8595297        | LOC100048589  | 1.6734993 |
|               |           | Klf6            | -1.8577044        | Sc4mol        | 1.6715423 |
|               |           | OTTMUSG00000    | -1.8570778        | Nostrin       | 1.6708229 |
|               |           | Hbegf           | -1.8493151        | Ccne2         | 1.6706231 |
|               |           | Hdc             | -1.8465268        | Bub1b         | 1.6664425 |
|               |           | Apol9b          | -1.8382696        | Lmo4          | 1.6609979 |
|               |           | Lpxn            | -1.8380530        | Srx24         | 1.6601036 |
|               |           | Rbm43           | -1.8305818        | Siah2         | 1.6548223 |
|               |           | Zfp36           | -1.8241248        | 1110002B05Rik | 1.6499252 |
|               |           | Stat5a          | -1.8241181        | Cenpi         | 1.6462436 |
|               |           | A2bp1           | -1.8238636        | Ctps          | 1.6402023 |
|               |           | Trim21          | -1.8176255        | Nxt2          | 1.6384340 |
|               |           | Tap2            | -1.8138431        | Sec11c        | 1.6383537 |
|               |           | Rassf1          | -1.8121411        | Susd3         | 1.6351575 |
|               |           | LOC100048721    | -1.8098993        | Esco2         | 1.6351039 |
|               |           | Pdzk1ip1        | -1.8078975        | Insig1        | 1.6304569 |
|               |           | C79267          | -1.8073524        | Elk3          | 1.6302668 |
|               |           | Map3k8          | -1.7992838        | Prkra         | 1.6282903 |
|               |           | Eif2ak2         | -1.7968379        | Zfyve21       | 1.6268657 |
|               |           | Eps8            | -1.7958175        | Cd83          | 1.6254196 |
|               |           | Tnfsf10         | -1.7948276        | Fhod1         | 1.6225248 |
|               |           | Tyki            | -1.7938474        | Nudt18        | 1.6204805 |
|               |           | Ccnd2           | -1.7913907        | Eno2          | 1.6201383 |
|               |           | Igf2bp2         | -1.7869213        | Kpna2         | 1.6170037 |
|               |           | Stat2           | -1.7853059        | Ccdc5         | 1.6161549 |
|               |           | Zeb2            | -1.7833992        | Tipin         | 1.6142354 |
|               |           | Tmem50b         | -1.7830508        | Pmaip1        | 1.6136146 |
|               |           | Hap1            | -1.7788889        | Ptpn6         | 1.6135300 |
|               |           | Cd40            | -1.7749975        | Ddx26b        | 1.6119134 |

|               |            |               |           |
|---------------|------------|---------------|-----------|
| Mrc1          | -1.7746948 | Mcm3          | 1.6113537 |
| Oas1b         | -1.7746365 | Hdac5         | 1.6104439 |
| Actn1         | -1.7740274 | Nudcd2        | 1.6098691 |
| Rnf31         | -1.7718213 | Rel           | 1.6093048 |
| Endod1        | -1.7704280 | D630023F18Rik | 1.6089804 |
| Plagl2        | -1.7697073 | Hist2h2ac     | 1.6072330 |
| Lrp4          | -1.7667683 | Nfkbiz        | 1.6068492 |
| Slc28a2       | -1.7664000 | Fbx4          | 1.6058824 |
| Il15          | -1.7662396 | Cep55         | 1.6035866 |
| Sh3bp2        | -1.7641146 | Dbp           | 1.6025424 |
| Bcar3         | -1.7609907 | Plk1          | 1.6009911 |
| Enpp4         | -1.7599417 | 1110032A13Rik | 1.6006851 |
| Mt2           | -1.7558685 | Lyl1          | 1.5995204 |
| C130026I21Rik | -1.7549746 | Elovl5        | 1.5994822 |
| Ptger2        | -1.7497013 | Grhpr         | 1.5987102 |
| Ppp4r1        | -1.7460057 | Cdca2         | 1.5981675 |
| Gna15         | -1.7458121 | Sin3a         | 1.5976842 |
| Pols          | -1.7437400 | 2310005P05Rik | 1.5955610 |
| Stk40         | -1.7426471 | Birc5         | 1.5919283 |
| Ptk2b         | -1.7357602 | Echs1         | 1.5919131 |
| Fzd5          | -1.7282723 | Arhgap18      | 1.5872888 |
| Evl           | -1.7242020 | Usp22         | 1.5864967 |
| Csf1          | -1.7198276 | Scd2          | 1.5857520 |
| Triobp        | -1.7193286 | BC088983      | 1.5821168 |
| Gm962         | -1.7187113 | E130016E03Rik | 1.5797923 |
| Sh3pxd2b      | -1.7176681 | lfnb1         | 1.5795930 |
| Plekhf2       | -1.7138864 | Tmem55b       | 1.5792079 |
| LOC100048299  | -1.7112346 | Tuft1         | 1.5788369 |
| Samhd1        | -1.7102648 | Ncrna00117    | 1.5765957 |
| Vps37b        | -1.7072105 | Hmgb2         | 1.5752243 |
| LOC100046883  | -1.7046611 | Cep78         | 1.5737101 |
| Vps54         | -1.7027499 | Pold1         | 1.5723650 |
| Tmem2         | -1.7026734 | Lmnb1         | 1.5687831 |
| Hoxb4         | -1.7018927 | Sbk           | 1.5668380 |
| Zfp281        | -1.6997378 | Nup85         | 1.5607740 |
| Car13         | -1.6995037 | Shcbp1        | 1.5589391 |
| Src           | -1.6966092 | Prps2         | 1.5582386 |
| Fgd6          | -1.6958317 | Slc6a9        | 1.5577746 |
| Phc2          | -1.6957361 | C79407        | 1.5573906 |
| Ndr1          | -1.6947833 | Acat2         | 1.5520032 |
| 4933428G20Rik | -1.6938318 | Rad54l        | 1.5516872 |
| Tlk2          | -1.6935635 | Socs5         | 1.5508916 |
| Rab19         | -1.6923751 | Kif4          | 1.5487389 |
| Crkl          | -1.6923736 | BC048355      | 1.5466063 |
| Pik3r6        | -1.6906863 | Pip4k2a       | 1.5465721 |
| Ush2a         | -1.6878151 | Bcl10         | 1.5458708 |
| Sp100         | -1.6852399 | Psmc3ip       | 1.5453175 |
| Mizf          | -1.6818533 | lfng1         | 1.5447804 |
| Lck           | -1.6805039 | Tcf19         | 1.5432236 |
| Bach1         | -1.6804309 | Klf9          | 1.5426311 |
| Map2k4        | -1.6803569 | Slc25a16      | 1.5414269 |
| Ptpro         | -1.6802947 | Hsf2          | 1.5409119 |
| 3300001P08Rik | -1.6788140 | 5830468K18Rik | 1.5408576 |
| Il17ra        | -1.6771066 | Stard7        | 1.5405468 |
| Vezf1         | -1.6767399 | Cenpp         | 1.5396419 |
| Prkx          | -1.6758219 | Tnf           | 1.5391737 |
| Setdb2        | -1.6721230 | Birc3         | 1.5390625 |
| Fas           | -1.6710804 | Bnip3l        | 1.5370344 |
| Adora2b       | -1.6692077 | Mrps35        | 1.5358817 |
| Ppm1l         | -1.6668708 | Pdxp          | 1.5355556 |
| E030034P13Rik | -1.6666667 | Tmem60        | 1.5353242 |
| Rnf135        | -1.6664842 | Dnase2a       | 1.5352902 |
| Stat1         | -1.6616484 | Exosc7        | 1.5350068 |
| Slc4a2        | -1.6591127 | 1810011O10Rik | 1.5341981 |
| Ass1          | -1.6551486 | Dhodh         | 1.5324737 |
| Adck1         | -1.6526128 | Suv420h2      | 1.5318488 |
| Furin         | -1.6525541 | Srf           | 1.5306905 |
| Rgs2          | -1.6515625 | Syce2         | 1.5304857 |
| 1190005F20Rik | -1.6490604 | Kif15         | 1.5292793 |
| Parp14        | -1.6473458 | Alkbh7        | 1.5284068 |
| Gpr109a       | -1.6469734 | OTTMUSG00000C | 1.5279939 |
| Irf2          | -1.6466136 | A330080J22Rik | 1.5274854 |
| Bcl2l1        | -1.6459466 | Rgs10         | 1.5268975 |
| Myd88         | -1.6453205 | Aldh18a1      | 1.5259366 |
| Cd164         | -1.6422484 | 3010026O09Rik | 1.5239899 |
| Ndr1          | -1.6421895 | Dld           | 1.5235849 |
| Mkl1          | -1.6420407 | Fmn           | 1.5231214 |
| Mobkl2b       | -1.6415730 | Apex1         | 1.5227996 |
| Zfp282        | -1.6402387 | 1810049H13Rik | 1.5227148 |
| BC006779      | -1.6382212 | 2410018C17Rik | 1.5225025 |

|               |            |               |           |
|---------------|------------|---------------|-----------|
| Tob2          | -1.6374068 | Cmas          | 1.5221163 |
| Slc17a6       | -1.6354454 | Al413582      | 1.5215176 |
| Edg5          | -1.6346154 | LOC676420     | 1.5213941 |
| Gmppb         | -1.6329075 | Rassf3        | 1.5207756 |
| Trafd1        | -1.6322463 | Slc2a3        | 1.5207679 |
| Irf8          | -1.6319527 | D4Wsu114e     | 1.5194489 |
| LOC100048346  | -1.6318461 | Slc25a33      | 1.5185924 |
| Tnfsf15       | -1.6295794 | Mettl11a      | 1.5178792 |
| Fbxl5         | -1.6287425 | Wdhd1         | 1.5162791 |
| Ppp1r15b      | -1.6283515 | D630014A15Rik | 1.5158879 |
| Rabif         | -1.6226566 | Rpa1          | 1.5157387 |
| Ppp1r10       | -1.6198934 | 2410017P07Rik | 1.5154639 |
| Usp18         | -1.6187042 | Dlgap5        | 1.5152505 |
| Ppp1r9b       | -1.6162564 | Tpra40        | 1.5141361 |
| Il13ra2       | -1.6153040 | Ticam2        | 1.5129088 |
| Hlx           | -1.6150442 | Clspn         | 1.5128617 |
| Slc29a3       | -1.6122143 | Paox          | 1.5126880 |
| Syvn1         | -1.6120464 | Pdgfb         | 1.5119562 |
| Ccl2          | -1.6102731 | Nlrp3         | 1.5115090 |
| Erccl1        | -1.6096423 | Manea         | 1.5078383 |
| Sepw1         | -1.6075425 | LOC100046741  | 1.5076923 |
| Tcirg1        | -1.6072010 | Xrcc6         | 1.5076705 |
| Tlr3          | -1.6064815 | Imp3          | 1.5032161 |
| Luc7l         | -1.6052632 | Rdh11         | 1.5023377 |
| Uaca          | -1.6049799 | 4930547N16Rik | 1.5000000 |
| Psemb8        | -1.6041176 | Rpain         | 1.4994872 |
| Havcr2        | -1.6027275 | 2010308M01Rik | 1.4993565 |
| Ihpk1         | -1.6026161 | Osbpl8        | 1.4984955 |
| Ep300         | -1.6005232 | Fosb          | 1.4968847 |
| Tgm2          | -1.5994943 | Incenp        | 1.4954373 |
| Tmco3         | -1.5993939 | Ppat          | 1.4948240 |
| Setd1b        | -1.5979936 | Ezh2          | 1.4942617 |
| Irf7          | -1.5979610 | Cias1         | 1.4937091 |
| Cyp2s1        | -1.5978261 | Pmm1          | 1.4922780 |
| 1810026123Rik | -1.5969607 | Ivns1abp      | 1.4919614 |
| Oas2          | -1.5963947 | Jmjd1a        | 1.4917647 |
| LOC100046232  | -1.5950668 | 6720467C03Rik | 1.4904993 |
| Pla1a         | -1.5948104 | 4930583H14Rik | 1.4892019 |
| LOC100045567  | -1.5945661 | Tmem23        | 1.4888257 |
| Il6           | -1.5918705 | Gfod1         | 1.4873774 |
| Ripk2         | -1.5906704 | Cbr3          | 1.4866013 |
| Zcchc6        | -1.5858733 | B3gnt1        | 1.4843104 |
| Zfp46         | -1.5848691 | Cetn2         | 1.4840567 |
| Abcg1         | -1.5774473 | 9530058B02Rik | 1.4829872 |
| Slc12a9       | -1.5756991 | St3gal6       | 1.4829054 |
| Socs3         | -1.5724217 | Plk4          | 1.4817844 |
| Zc3h12d       | -1.5707865 | Paip2b        | 1.4816810 |
| Fam129a       | -1.5677645 | Cdc216        | 1.4815391 |
| Xrn1          | -1.5673004 | Dhcr7         | 1.4808013 |
| Smg7          | -1.5664801 | Klhl15        | 1.4799437 |
| Sphk2         | -1.5654867 | 1810063B05Rik | 1.4793926 |
| Scin          | -1.5646950 | Cdca5         | 1.4793333 |
| Dync1h1       | -1.5642477 | 5330401P04Rik | 1.4787363 |
| LOC435565     | -1.5632911 | Ung           | 1.4786036 |
| Atg16l1       | -1.5631863 | Dner          | 1.4777145 |
| Phf11         | -1.5622558 | 2700097O09Rik | 1.4772329 |
| Gstt4         | -1.5604607 | Zmat3         | 1.4753521 |
| Dtx2          | -1.5597904 | Ankrd47       | 1.4753363 |
| Ccdc25        | -1.5540757 | Neu1          | 1.4741953 |
| LOC100047963  | -1.5540420 | Cdca3         | 1.4741455 |
| Sec24b        | -1.5536989 | Akap7         | 1.4737028 |
| Trps1         | -1.5533723 | Uvrug         | 1.4724970 |
| Trim25        | -1.5518117 | Alkbh5        | 1.4723757 |
| LOC100048105  | -1.5511459 | Prkag2        | 1.4712482 |
| Itgav         | -1.5499336 | Cdr2          | 1.4696061 |
| Apbb2         | -1.5496657 | Unc84b        | 1.4684633 |
| Dusp7         | -1.5490526 | Rnase4        | 1.4680759 |
| EG665378      | -1.5487233 | Phf17         | 1.4679113 |
| Whdc1         | -1.5473118 | Zc3h12a       | 1.4677567 |
| Lrrc33        | -1.5464775 | 8430410A17Rik | 1.4663717 |
| Kcnn4         | -1.5445273 | Nr1d2         | 1.4657343 |
| Ptorj         | -1.5440835 | Zfp277        | 1.4656789 |
| Pstpip1       | -1.5436052 | Acot1         | 1.4654088 |
| AA960436      | -1.5421835 | Ttc7          | 1.4610245 |
| Frs2          | -1.5407489 | 1500011H22Rik | 1.4602868 |
| Ubttd1        | -1.5392101 | Pmvk          | 1.4601449 |
| Cttnbp2nl     | -1.5391455 | Pacs1         | 1.4574970 |
| Usp19         | -1.5387021 | Wdr6          | 1.4568245 |
| Rhbdif2       | -1.5384615 | Arrdc4        | 1.4561545 |
| Slc12a7       | -1.5381914 | Grasp         | 1.4558671 |

|               |            |               |           |
|---------------|------------|---------------|-----------|
| B230339H12Rik | -1.5357440 | Mbtd1         | 1.4556522 |
| Rsad2         | -1.5354781 | Dnajc8        | 1.4517055 |
| Slc25a25      | -1.5348066 | Itpkc         | 1.4451246 |
| Pitpnm1       | -1.5340532 | Gnb5          | 1.4445554 |
| Ap3m2         | -1.5331842 | Tubb2c        | 1.4445022 |
| Arhgap25      | -1.5324201 | Mid1ip1       | 1.4435484 |
| LOC100045644  | -1.5322338 | Acbd4         | 1.4417574 |
| Tor1aip1      | -1.5321866 | 6620401K05Rik | 1.4416855 |
| Pqlc1         | -1.5321649 | Akr1e1        | 1.4415292 |
| Zbtb32        | -1.5307957 | Galnt11       | 1.4407985 |
| LOC100044190  | -1.5291727 | Mcph1         | 1.4381885 |
| 6330578E17Rik | -1.5290219 | Klhdc2        | 1.4379439 |
| Stx3          | -1.5278230 | LOC668837     | 1.4378476 |
| Slc9a1        | -1.5269953 | Zbtb22        | 1.4373508 |
| 4831426I19Rik | -1.5267068 | Cdc42ep4      | 1.4370436 |
| Firt2         | -1.5258835 | Chchd3        | 1.4368932 |
| Sh3kbp1       | -1.5255510 | Spata21       | 1.4354067 |
| Slc45a3       | -1.5253296 | Rccd1         | 1.4349727 |
| BC017643      | -1.5247715 | C80913        | 1.4344517 |
| Gclm          | -1.5242740 | Fam162a       | 1.4331309 |
| Slc6a4        | -1.5237530 | Tmem199       | 1.4330343 |
| Casp1         | -1.5231862 | Slc35b2       | 1.4327814 |
| Tmem106a      | -1.5220089 | Tmem184c      | 1.4327019 |
| Golga1        | -1.5210450 | Rpe           | 1.4325492 |
| Capn5         | -1.5188497 | Hmgcl         | 1.4320335 |
| Nuak2         | -1.5187889 | Nedd4l        | 1.4319690 |
| BC017647      | -1.5187293 | Sfxn1         | 1.4318409 |
| Tceb3         | -1.5180319 | Sipa1l1       | 1.4316992 |
| Zbp1          | -1.5176416 | 2610039C10Rik | 1.4314844 |
| Sphk1         | -1.5168691 | Plekhg3       | 1.4314442 |
| Elf1          | -1.5168135 | Prps1         | 1.4313172 |
| AI467606      | -1.5163525 | Csnk1e        | 1.4307692 |
| Atp2b1        | -1.5162228 | Lss           | 1.4305263 |
| 1700112C13Rik | -1.5157526 | Gprk6         | 1.4303665 |
| Zranb3        | -1.5155779 | Slc16a6       | 1.4289793 |
| Naip2         | -1.5146341 | Clpb          | 1.4275148 |
| Slc39a14      | -1.5126506 | Osbp12        | 1.4269458 |
| Gtf2f1        | -1.5125313 | Pnkp          | 1.4264347 |
| Cyth4         | -1.5124771 | Siva1         | 1.4258088 |
| Clec2d        | -1.5124416 | Grb7          | 1.4249147 |
| Sertad1       | -1.5123526 | Polr1e        | 1.4243316 |
| Zfp592        | -1.5122117 | Gtse1         | 1.4241316 |
| Jak2          | -1.5121069 | Rela          | 1.4236495 |
| Asb13         | -1.5116713 | Exosc8        | 1.4232794 |
| Atxn1         | -1.5099338 | Kihl17        | 1.4228549 |
| Isg20         | -1.5073543 | Galk1         | 1.4220114 |
| Zfp12         | -1.5063762 | Mib2          | 1.4211516 |
| Dhrs9         | -1.5063371 | Glod4         | 1.4206897 |
| Tesk1         | -1.5043318 | Snupn         | 1.4199840 |
| Parp3         | -1.5027523 | Rps6ka5       | 1.4188406 |
| A830007P12Rik | -1.5023445 | Stk39         | 1.4185693 |
| Tnip2         | -1.4974033 | Xrcc2         | 1.4160757 |
| Amigo3        | -1.4970356 | Slc46a3       | 1.4159734 |
| Rab7i1        | -1.4968955 | Sh3bp1        | 1.4159462 |
| Eng           | -1.4955839 | Tlcd1         | 1.4154519 |
| Nub1          | -1.4942637 | Dnase1l1      | 1.4147258 |
| Ccdc23        | -1.4931458 | Scn10a        | 1.4145985 |
| Lgals9        | -1.4928506 | Six6          | 1.4140508 |
| Ccdc86        | -1.4902036 | Pif1          | 1.4132361 |
| Samd9l        | -1.4890630 | B930041F14Rik | 1.4126506 |
| 2610208M17Rik | -1.4884347 | Rmnd1         | 1.4100000 |
| Maea          | -1.4869437 | Taf1d         | 1.4096718 |
| Zbtb45        | -1.4855807 | Slc28a1       | 1.4096601 |
| Mmp9          | -1.4851190 | Acn9          | 1.4094575 |
| Edn1          | -1.4849484 | Amd2          | 1.4086022 |
| Rab15         | -1.4831804 | Zer1          | 1.4085779 |
| Pldn          | -1.4797637 | ldh1          | 1.4080979 |
| Mafk          | -1.4794118 | 1500010J02Rik | 1.4071429 |
| 2010002N04Rik | -1.4782425 | Mgst2         | 1.4070556 |
| Tpbg          | -1.4779961 | Sdhd          | 1.4054861 |
| Fmn1          | -1.4775687 | Rab27a        | 1.4052574 |
| Gypc          | -1.4765254 | Bcap29        | 1.4042920 |
| Letmd1        | -1.4746439 | Nipa1         | 1.4042116 |
| Casp4         | -1.4746201 | Smarcd2       | 1.4036145 |
| Pdgfa         | -1.4740504 | Mmd           | 1.4026083 |
| Il15ra        | -1.4730631 | Cd320         | 1.4025457 |
| Bicap         | -1.4716581 | Meis2         | 1.4017467 |
| Apaf1         | -1.4700855 | Gstt3         | 1.4011733 |
| Cdyl2         | -1.4692308 | Tnfrsf26      | 1.3984716 |
| Tapbp         | -1.4682353 | Med21         | 1.3977159 |

|               |            |               |           |
|---------------|------------|---------------|-----------|
| Tgtp          | -1.4671815 | lfrd2         | 1.3974970 |
| Mov10         | -1.4661230 | Pnpla8        | 1.3973094 |
| Cmtm6         | -1.4654709 | Dus4l         | 1.3955071 |
| Aim2          | -1.4646119 | Ecsit         | 1.3953046 |
| Snx30         | -1.4635347 | Usp28         | 1.3950495 |
| Ythdf1        | -1.4629167 | Hadhb         | 1.3945434 |
| Nfkb1         | -1.4628242 | 6430531B16Rik | 1.3942857 |
| Trim41        | -1.4618193 | Cyp51         | 1.3940652 |
| Bcat1         | -1.4615216 | Osbpl3        | 1.3939663 |
| Slc11a1       | -1.4605142 | Tbl2          | 1.3926914 |
| LOC100046406  | -1.4603740 | Ssx2ip        | 1.3926812 |
| Pmm2          | -1.4599082 | Pde6d         | 1.3925550 |
| Car4          | -1.4578616 | Wdr67         | 1.3924647 |
| Cln3          | -1.4565069 | Srpk2         | 1.3906752 |
| Agpat4        | -1.4562351 | LOC100044158  | 1.3904881 |
| Snap29        | -1.4550319 | Trmt6         | 1.3901345 |
| Wsb2          | -1.4548302 | Cenpk         | 1.3891941 |
| Aftph         | -1.4545684 | Tuba1a        | 1.3884253 |
| BC003236      | -1.4545549 | Zfp512        | 1.3884108 |
| Casp2         | -1.4539923 | Smyd4         | 1.3881020 |
| Gadd45g       | -1.4539237 | Zfp770        | 1.3879736 |
| B230312A22Rik | -1.4514793 | Mcm5          | 1.3876489 |
| Ugcg          | -1.4495099 | Osgepl1       | 1.3875969 |
| Prmt2         | -1.4492531 | Nasp          | 1.3869749 |
| Oraov1        | -1.4491850 | Gnl3          | 1.3865457 |
| Pik3cd        | -1.4489796 | Gtl3          | 1.3862468 |
| Gpatch4       | -1.4444444 | O610007C21Rik | 1.3854945 |
| Mobkl2c       | -1.4428413 | St18          | 1.3852184 |
| C3            | -1.4413965 | Sema4b        | 1.3848801 |
| Cyp4v3        | -1.4408022 | Ati2          | 1.3847118 |
| Psmb10        | -1.4399800 | Nipsnap1      | 1.3842267 |
| Setd4         | -1.4390569 | Cldn11        | 1.3836038 |
| Hsp105        | -1.4365441 | Inpp5a        | 1.3824027 |
| Diap1         | -1.4351903 | Myc           | 1.3821656 |
| Siglec1       | -1.4344873 | Stk24         | 1.3819249 |
| Arhgap22      | -1.4342105 | Fancd2        | 1.3818807 |
| Dhx58         | -1.4338140 | E2f2          | 1.3818636 |
| Rnf214        | -1.4332211 | Sccpdh        | 1.3814353 |
| Plaur         | -1.4327848 | Mtbp          | 1.3810843 |
| Tmem127       | -1.4325218 | Ick           | 1.3805355 |
| Rnpep         | -1.4320167 | Hexb          | 1.3792686 |
| Plekha4       | -1.4310051 | Tmem9         | 1.3792511 |
| Apobec1       | -1.4306493 | Sergef        | 1.3790927 |
| Mmp13         | -1.4305556 | Smarca2       | 1.3785291 |
| Ms4a6d        | -1.4292461 | Grin2c        | 1.3783784 |
| Slc25a37      | -1.4280576 | Jdp2          | 1.3783487 |
| Ankrd50       | -1.4265945 | Tuba3b        | 1.3773148 |
| Slc15a3       | -1.4263817 | Orai3         | 1.3773120 |
| Vrk2          | -1.4262842 | Brip1         | 1.3772321 |
| S830484A20Rik | -1.4261201 | Drg1          | 1.3771972 |
| LOC100048583  | -1.4259134 | Rpl22l1       | 1.3761302 |
| Plekhm1       | -1.4258142 | Fen1          | 1.3760168 |
| A230051G13Rik | -1.4249400 | 3000004C01Rik | 1.3758542 |
| Orai1         | -1.4244604 | Etv5          | 1.3754557 |
| Kctd10        | -1.4240325 | Gm561         | 1.3753943 |
| Tmbim6        | -1.4233073 | Id2           | 1.3752643 |
| Fyb           | -1.4231069 | Dusp19        | 1.3746333 |
| AI504432      | -1.4221364 | Scamp5        | 1.3744681 |
| Itgb2         | -1.4214286 | Mtss1         | 1.3740530 |
| Anpep         | -1.4211648 | Mocos         | 1.3734719 |
| Nat2          | -1.4203227 | Rpa3          | 1.3727243 |
| Adar          | -1.4188416 | LOC100046254  | 1.3724570 |
| St6galnac4    | -1.4175472 | Sirt3         | 1.3724203 |
| Sh3bp5l       | -1.4164872 | 9630015D15Rik | 1.3723042 |
| Sdc1          | -1.4164004 | Phkg2         | 1.3721470 |
| Ankfy1        | -1.4154392 | Gcs1          | 1.3719610 |
| Socs1         | -1.4154334 | Klhl7         | 1.3717364 |
| Il1a          | -1.4139578 | Junb          | 1.3712056 |
| Slc6a8        | -1.4135514 | Pwp1          | 1.3709566 |
| Zfp382        | -1.4131812 | Polr3h        | 1.3702690 |
| LOC235497     | -1.4131514 | LOC100044779  | 1.3695741 |
| Popdc2        | -1.4123288 | Rrs1          | 1.3690112 |
| Gp49a         | -1.4118189 | Tfdp1         | 1.3688930 |
| Ptgir         | -1.4113419 | Ndrp2         | 1.3686427 |
| Mtif3         | -1.4110654 | Pfkl          | 1.3683266 |
| Pgam2         | -1.4102142 | Hsd3b7        | 1.3681462 |
| Pxn           | -1.4102070 | Fastkd1       | 1.3675769 |
| Zfp637        | -1.4097689 | Ccdc115       | 1.3667377 |
| 1200015F23Rik | -1.4096260 | Relb          | 1.3665583 |
| Taf15         | -1.4092002 | LOC677144     | 1.3665498 |

|               |            |               |           |
|---------------|------------|---------------|-----------|
| 1500031L02Rik | -1.4091559 | 3110001A13Rik | 1.3661417 |
| Cplx4         | -1.4085366 | Fam158a       | 1.3661127 |
| Parp12        | -1.4082810 | Uba2          | 1.3653232 |
| Cpsf4         | -1.4080172 | Osbpl9        | 1.3647161 |
| Eya3          | -1.4077548 | Kif11         | 1.3645925 |
| Tcf4          | -1.4060853 | Josd1         | 1.3645157 |
| Trim11        | -1.4059406 | Commd3        | 1.3644312 |
| Cdc2l5        | -1.4059233 | Bag5          | 1.3642173 |
| Ush3a         | -1.4054441 | Tmem41a       | 1.3633540 |
| Xylt2         | -1.4046706 | Uck2          | 1.3630476 |
| LOC100046003  | -1.4042002 | Bcl6b         | 1.3626971 |
| Clcn7         | -1.4039874 | Tm2d2         | 1.3611056 |
| Zfp313        | -1.4030846 | Cd276         | 1.3604938 |
| Vim           | -1.4025426 | Spc24         | 1.3602379 |
| Vps37c        | -1.4023961 | Psat1         | 1.3600381 |
| Rnf114        | -1.4023281 | 2310079N02Rik | 1.3578376 |
| Limd1         | -1.4016028 | Slc19a1       | 1.3565634 |
| Top3a         | -1.4015837 | 5730410119Rik | 1.3565030 |
| LOC100047934  | -1.4015072 | Pop5          | 1.3551402 |
| Pcsk7         | -1.4014085 | Al847670      | 1.3549618 |
| Lasp1         | -1.4010578 | Rnf43         | 1.3547297 |
| Cd44          | -1.4006515 | Zfp330        | 1.3540452 |
| Gna13         | -1.3991390 | Rrm1          | 1.3539836 |
| Ccrk          | -1.3989114 | Aldh6a1       | 1.3538999 |
| Hk3           | -1.3985195 | Pskh1         | 1.3531977 |
| Iffi205       | -1.3980392 | Olfrr1420     | 1.3527653 |
| Myo10         | -1.3977456 | Sgk1          | 1.3523429 |
| Mad2l1bp      | -1.3950061 | Mtmr12        | 1.3512811 |
| Slc7a11       | -1.3948400 | Agfg2         | 1.3512727 |
| Slc31a2       | -1.3939994 | Ankzf1        | 1.3510499 |
| Prkg2         | -1.3939602 | 5133400G04Rik | 1.3505095 |
| Stau1         | -1.3939394 | Alkbh2        | 1.3503254 |
| LOC100046781  | -1.3933333 | Srx14         | 1.3502162 |
| Arfgap1       | -1.3929804 | Nab1          | 1.3500770 |
| Dcp1a         | -1.3929092 |               |           |
| Sgpl1         | -1.3928330 |               |           |
| 6330442E10Rik | -1.3927379 |               |           |
| Tgfb1         | -1.3923547 |               |           |
| Nfix          | -1.3920884 |               |           |
| Tra2a         | -1.3915766 |               |           |
| Clec5a        | -1.3906375 |               |           |
| Trim16        | -1.3893491 |               |           |
| Apobec3       | -1.3881890 |               |           |
| Csf2ra        | -1.3878594 |               |           |
| Mfsd7a        | -1.3871224 |               |           |
| Irgm1         | -1.3864108 |               |           |
| Endogl1       | -1.3854167 |               |           |
| Pik3ap1       | -1.3852584 |               |           |
| Acvr1         | -1.3849575 |               |           |
| Cish          | -1.3843308 |               |           |
| Sart1         | -1.3830721 |               |           |
| Al837181      | -1.3826140 |               |           |
| Pcgf5         | -1.3817579 |               |           |
| Ube1l         | -1.3813747 |               |           |
| Mbc2          | -1.3811698 |               |           |
| Aim1          | -1.3793734 |               |           |
| Iffi204       | -1.3787037 |               |           |
| Slamf8        | -1.3781190 |               |           |
| Itgb7         | -1.3779528 |               |           |
| Ubap1         | -1.3774171 |               |           |
| Frag1         | -1.3769096 |               |           |
| Fbxo46        | -1.3768844 |               |           |
| S100a8        | -1.3768116 |               |           |
| Ttc30a2       | -1.3766892 |               |           |
| Cwf19l2       | -1.3764846 |               |           |
| Nkiras2       | -1.3759330 |               |           |
| Gtf2a1        | -1.3754513 |               |           |
| Hsbp1         | -1.3754354 |               |           |
| Tlr4          | -1.3753709 |               |           |
| Lamc1         | -1.3743372 |               |           |
| Epb7.2        | -1.3742489 |               |           |
| Gnal1         | -1.3739956 |               |           |
| Nupr1         | -1.3739244 |               |           |
| Atm           | -1.3739188 |               |           |
| Minpp1        | -1.3732236 |               |           |
| Por           | -1.3725391 |               |           |
| F10           | -1.3720430 |               |           |
| Ankrd13a      | -1.3715946 |               |           |
| 2310003C23Rik | -1.3715342 |               |           |
| Atp6v0a1      | -1.3714508 |               |           |

|               |            |
|---------------|------------|
| Zfp91-cntf    | -1.3696335 |
| Tirap         | -1.3694845 |
| Rusc2         | -1.3688161 |
| Trim35        | -1.3684211 |
| Gm1040        | -1.3681462 |
| 2700055A20Rik | -1.3679824 |
| Pes1          | -1.3673469 |
| Klk1b16       | -1.3672414 |
| Ch25h         | -1.3667650 |
| Ehd2          | -1.3663178 |
| Rbm5          | -1.3658829 |
| Lig4          | -1.3655514 |
| Trpv2         | -1.3655025 |
| Grina         | -1.3654511 |
| Zbtb5         | -1.3650552 |
| Kbtbd4        | -1.3650263 |
| Rreb1         | -1.3649497 |
| Lcn2          | -1.3649425 |
| Stx12         | -1.3645190 |
| LOC674706     | -1.3638541 |
| Slamf9        | -1.3637064 |
| Dlgap3        | -1.3628763 |
| Dpep1         | -1.3625498 |
| Ppfibp1       | -1.3624679 |
| LOC640963     | -1.3617021 |
| Olfir746      | -1.3613445 |
| Aven          | -1.3612335 |
| Sac3d1        | -1.3609302 |
| Atp9b         | -1.3605528 |
| Hsd17b14      | -1.3600973 |
| Plod1         | -1.3600973 |
| Rai14         | -1.3598626 |
| Zfp513        | -1.3596177 |
| Cbl           | -1.3589436 |
| Ecm1          | -1.3582162 |
| Olfir924      | -1.3575910 |
| Mid1          | -1.3575758 |
| Zfp207        | -1.3575362 |
| 5133401N09Rik | -1.3574371 |
| Dcakd         | -1.3572615 |
| Ctcf1         | -1.3568758 |
| Usp15         | -1.3564994 |
| Irx2          | -1.3561763 |
| Txnip         | -1.3558841 |
| Leprotl1      | -1.3558819 |
| Gjb1          | -1.3556582 |
| Slc11a2       | -1.3539621 |
| EG630499      | -1.3529895 |
| Zfp386        | -1.3526735 |
| Azi2          | -1.3524684 |
| Sprr2k        | -1.3524229 |
| Gga3          | -1.3522727 |
| Arntl         | -1.3521602 |
| Casp7         | -1.3517915 |
| Snx11         | -1.3516251 |
| Cndp2         | -1.3515666 |
| Tmbim1        | -1.3506347 |
